# Supplementary material for: Adaptation analysis of two Asteraceae invasive plants in Lhasa, Tibet
Source: PeerJ. 2025 Jul 7;13:e19667. doi: 10.7717/peerj.19667 (PMC12244131; doi:10.7717/peerj.19667)
Supplement: Supplemental Information 1 [file peerj-13-19667-s001.xlsx]

## Sheet: Supplementary Table 1
Supplementary Table 1. Germination and plant height data of B. pilosa and T. minuta from different provenances
Location *	Germination Count	Plant Height (cm)
LS-1	89	21.7, 32.4, 29.5, 28.4, 28, 26.8, 24.5, 21, 21.5, 29, 22, 14.2, 18.2, 15.5, 21.5, 20.8, 30, 24.8, 29.6, 18.2, 28.2, 28.3, 21.4, 28.3, 28.2, 21.2, 29.5, 18.3, 28.8, 20.8
LS-2	12	9.3, 16, 10.1, 8, 7.8, 8.7, 7.2, 10, 5.2, 7.4, 8.3, 8.6
LS-3	14	22.2, 15.4, 18.8, 14, 10.1, 17, 6.3, 14, 21.6, 13.2, 12.3, 15.5, 15.3, 12.1
MY-1	107	9.1, 12.3, 7.2, 10.7, 6, 15.4, 19.5, 5.1, 7.1, 19.1, 13.7, 18.4, 17, 16, 19.9, 18.7, 15.2, 19.7, 19.3, 7.0, 18, 19.5, 19.6, 15.4, 19, 19.3, 7.1, 12.2, 7.7, 5.3
MY-2	47	13, 9.7, 7.2, 8.6, 6.5, 8.2, 5.4, 4.7, 21.5, 9.9, 8.8, 7.9, 11.7, 16, 15, 7.5, 8.2, 11.4, 11.5, 5.6, 9, 4.4, 8.7, 8.9, 12.5, 14.4, 14.8, 7.1, 12.6, 4.1
MY-3	23	5, 8.3, 7, 6.3, 9.4, 12.4, 8.4, 5.2, 7.2, 8.4, 9.2, 5.7, 7.5, 9.4, 7.5, 12.9, 12.2, 6.8, 8.5, 7.5, 6.2, 12.4, 7.1
QD-1	116	8.6, 6, 4.9, 9.4, 9.5, 7.3, 8, 9, 10.6, 12.3, 7.9, 11.4, 9.3, 6.4, 5.3, 7.2, 9.7, 9.8, 4.3, 8.9, 5.3, 4.8, 8, 11.5, 11.6, 7.2, 11.5, 10.7, 4.9, 9.6
QD-2	102	12.2, 11.5, 9.2, 6, 11.8, 13.7, 8.2, 10.5, 13.2, 7.9, 8.2, 8.7, 8.4, 11.3, 7.7, 12.3, 8, 8, 8, 13.7, 11.7, 13.4, 5.4, 9.7, 10.2, 13.8, 12.1, 11.5, 9.8, 13.8
QD-3	41	11.5, 7.5, 8.4, 5, 10.3, 9.2, 13.9, 11.8, 6.2, 7.8, 11, 12.9, 7.4, 11.3, 7.9, 7.7, 5.5, 7.5, 7.8, 6.8, 7.8, 8, 7.2, 13.6, 9.1, 10.5, 8, 14, 8.5, 6.8
LZ-1	37	8.4, 9.8, 12.2, 10.8, 11.6, 13.3, 11.5, 14.4, 15.2, 5.2, 13.8, 11.7, 10.3, 10.7, 10, 9.3, 14, 11.9, 9.5, 13.8, 5.7, 12, 15, 10.8, 13.9, 13.4, 11.9, 10.5, 12.8, 10.7
LZ-2	139	26, 24.4, 20.6, 22.7, 17.8, 16.5, 21.8, 20, 18.1, 22.6, 17.6, 24.8, 24.6, 18.2, 21.5, 21.6, 25.6, 21.4, 17.9, 20.3, 22.5, 22.8, 20.2, 20, 22, 17, 16.8, 16.3, 20.9, 21.3
LZ-3	48	5.7, 15.5, 17.6, 21.8, 27.7, 21.9, 28.8, 26.6, 27.5, 11.9, 22.8, 32.2, 27.3, 18, 21.7, 26.5, 32.8, 28.3, 15.7, 27.8, 15.3, 17.7, 15.8, 22.4, 17, 23, 28.2, 32.5, 15, 21.6
KM-1	132	28.6, 30, 26.5, 25.2, 23.4, 24.3, 30.7, 32.7, 32, 33.7, 29.6, 30.2, 25.3, 30.5, 31.6, 24.9, 32.7, 30.1, 31.7, 32.1, 30, 25.3, 32.1, 29, 23.9, 23.1, 24.5, 24.8, 28.4, 25.8
KM-2	91	17.5, 18.9, 21.4, 15.5, 16.8, 11.6, 9.8, 13, 17.3, 12.5, 18.6, 21.1, 15.7, 11.6, 21.7, 21.5, 18.6, 13, 16.3, 9.9, 18.2, 21, 21.1, 12.5, 17.3, 12, 15.7, 15.9, 18.2, 16.3
KM-3	78	14, 22.2, 25.7, 16, 17.6, 22.4, 16.8, 22, 18.7, 17.1, 22.5, 14.5, 22.2, 25.4, 17.2, 25.3, 18, 21.3, 22.9, 16.4, 16, 17.7, 16.3, 17.1, 17.2, 25.7, 22.4, 21.7, 16.3, 16.5
Tm-1	20	30.8, 12.6, 12, 13.6, 8.9, 10, 7.5, 6.8, 7.2, 9.4, 15.9, 13.2, 9.7, 7.1, 7.6, 12.8, 15.3, 14, 7.5, 7.4
Tm-2	29	12.8, 25.3, 35, 38.9, 42.8, 43.8, 29.3, 28, 16.7, 20.8, 32.3, 42.4, 45, 33.4, 45.4, 33.2, 20.8, 34.7, 29.2, 33.8, 27.4, 12.3, 42.8, 43.4, 33.6, 33.8, 42.4, 20.7, 20.6
Tm-3	11	35, 48.7, 51, 38.6, 67.7, 28.2, 40.8, 33.7, 56.3, 56.2, 56.4
*In this column, the letters before the "-" indicate the location, while the numbers 1, 2, and 3 after it correspond to burial depths of 0cm, 1cm, and 3cm, respectively.

## Sheet: Supplementary Table 2
Supplementary Table 2. Raw recorded data from small weather stations
Date	AIRTemp	RAIN
2022-01-01T00:00:00	-3.62	0
2022-01-01T00:15:00	-3.52	0
2022-01-01T00:30:00	-3.41	0
2022-01-01T00:45:00	-3.12	0
2022-01-01T01:00:00	-3.13	0
2022-01-01T01:15:00	-3.31	0
2022-01-01T01:30:00	-3.55	0
2022-01-01T01:45:00	-4.07	0
2022-01-01T02:00:00	-4.53	0
2022-01-01T02:15:00	-4.46	0
2022-01-01T02:30:00	-4.43	0
2022-01-01T02:45:00	-4.49	0
2022-01-01T03:00:00	-4.63	0
2022-01-01T03:15:00	-4.68	0
2022-01-01T03:30:00	-4.77	0
2022-01-01T03:45:00	-5.12	0
2022-01-01T04:00:00	-5.24	0
2022-01-01T04:15:00	-5.51	0
2022-01-01T04:30:00	-5.86	0
2022-01-01T04:45:00	-5.9	0
2022-01-01T05:00:00	-5.88	0
2022-01-01T05:15:00	-6.07	0
2022-01-01T05:30:00	-6.53	0
2022-01-01T05:45:00	-6.91	0
2022-01-01T06:00:00	-7.21	0
2022-01-01T06:15:00	-7.21	0
2022-01-01T06:30:00	-7.34	0
2022-01-01T06:45:00	-7.56	0
2022-01-01T07:00:00	-7.76	0
2022-01-01T07:15:00	-7.78	0
2022-01-01T07:30:00	-7.84	0
2022-01-01T07:45:00	-7.99	0
2022-01-01T08:00:00	-8.15	0
2022-01-01T08:15:00	-8.36	0
2022-01-01T08:30:00	-8.6	0
2022-01-01T08:45:00	-8.6	0
2022-01-01T09:00:00	-8.41	0
2022-01-01T09:15:00	-8.42	0
2022-01-01T09:30:00	-8.54	0
2022-01-01T09:45:00	-8.5	0
2022-01-01T10:00:00	-8.18	0
2022-01-01T10:15:00	-7.88	0
2022-01-01T10:30:00	-7.57	0
2022-01-01T10:45:00	-7.14	0
2022-01-01T11:00:00	-6.63	0
2022-01-01T11:15:00	-6.31	0
2022-01-01T11:30:00	-5.79	0
2022-01-01T11:45:00	-5.32	0
2022-01-01T12:00:00	-4.58	0
2022-01-01T12:15:00	-4.06	0
2022-01-01T12:30:00	-3.63	0
2022-01-01T12:45:00	-3.31	0
2022-01-01T13:00:00	-2.48	0
2022-01-01T13:15:00	0.23	0
2022-01-01T13:30:00	1.48	0
2022-01-01T13:45:00	2.4	0
2022-01-01T14:00:00	3.18	0
2022-01-01T14:15:00	4.21	0
2022-01-01T14:30:00	4.83	0
2022-01-01T14:45:00	4.35	0
2022-01-01T15:00:00	5.06	0
2022-01-01T15:15:00	5.99	0
2022-01-01T15:30:00	6.52	0
2022-01-01T15:45:00	6.21	0
2022-01-01T16:00:00	5.91	0
2022-01-01T16:15:00	5.66	0
2022-01-01T16:30:00	5.11	0
2022-01-01T16:45:00	4.5	0
2022-01-01T17:00:00	5.35	0
2022-01-01T17:15:00	5.36	0
2022-01-01T17:30:00	5.19	0
2022-01-01T17:45:00	4.93	0
2022-01-01T18:00:00	5.12	0
2022-01-01T18:15:00	3.51	0
2022-01-01T18:30:00	2.82	0
2022-01-01T18:45:00	2.01	0
2022-01-01T19:00:00	1.4	0
2022-01-01T19:15:00	-0.16	0
2022-01-01T19:30:00	-1.4	0
2022-01-01T19:45:00	-1.75	0
2022-01-01T20:00:00	-2.18	0
2022-01-01T20:15:00	-2.98	0
2022-01-01T20:30:00	-3.15	0
2022-01-01T20:45:00	-2.47	0
2022-01-01T21:00:00	-2.27	0
2022-01-01T21:15:00	-2.39	0
2022-01-01T21:30:00	-2.51	0
2022-01-01T21:45:00	-2.44	0
2022-01-01T22:00:00	-2.81	0
2022-01-01T22:15:00	-3.06	0
2022-01-01T22:30:00	-2.81	0
2022-01-01T22:45:00	-2.86	0
2022-01-01T23:00:00	-2.78	0
2022-01-01T23:15:00	-2.59	0
2022-01-01T23:30:00	-2.54	0
2022-01-01T23:45:00	-2.82	0
2022-01-02T00:00:00	-2.27	0
2022-01-02T00:15:00	-1.72	0
2022-01-02T00:30:00	-1.73	0
2022-01-02T00:45:00	-2.21	0
2022-01-02T01:00:00	-2.39	0
2022-01-02T01:15:00	-2.42	0
2022-01-02T01:30:00	-2.46	0
2022-01-02T01:45:00	-2.71	0
2022-01-02T02:00:00	-2.77	0
2022-01-02T02:15:00	-2.8	0
2022-01-02T02:30:00	-2.82	0
2022-01-02T02:45:00	-3.24	0
2022-01-02T03:00:00	-3.54	0
2022-01-02T03:15:00	-3.67	0
2022-01-02T03:30:00	-3.23	0
2022-01-02T03:45:00	-2.74	0
2022-01-02T04:00:00	-3.12	0
2022-01-02T04:15:00	-3.7	0
2022-01-02T04:30:00	-3.82	0
2022-01-02T04:45:00	-3.71	0
2022-01-02T05:00:00	-3.72	0
2022-01-02T05:15:00	-3.68	0
2022-01-02T05:30:00	-3.96	0
2022-01-02T05:45:00	-4.2	0
2022-01-02T06:00:00	-4.11	0
2022-01-02T06:15:00	-4.38	0
2022-01-02T06:30:00	-4.78	0
2022-01-02T06:45:00	-4.74	0
2022-01-02T07:00:00	-4.9	0
2022-01-02T07:15:00	-5.36	0
2022-01-02T07:30:00	-5.67	0
2022-01-02T07:45:00	-5.6	0
2022-01-02T08:00:00	-5.94	0
2022-01-02T08:15:00	-6.42	0
2022-01-02T08:30:00	-6.68	0
2022-01-02T08:45:00	-6.54	0
2022-01-02T09:00:00	-6.54	0
2022-01-02T09:15:00	-6.58	0
2022-01-02T09:30:00	-6.79	0
2022-01-02T09:45:00	-6.39	0
2022-01-02T10:00:00	-5.94	0
2022-01-02T10:15:00	-5.72	0
2022-01-02T10:30:00	-5.35	0
2022-01-02T10:45:00	-4.98	0
2022-01-02T11:00:00	-4.61	0
2022-01-02T11:15:00	-4.22	0
2022-01-02T11:30:00	-3.79	0
2022-01-02T11:45:00	-3.22	0
2022-01-02T12:00:00	-2.71	0
2022-01-02T12:15:00	-2.48	0
2022-01-02T12:30:00	-2.08	0
2022-01-02T12:45:00	-1.47	0
2022-01-02T13:00:00	-0.16	0
2022-01-02T13:15:00	2.73	0
2022-01-02T13:30:00	4.55	0
2022-01-02T13:45:00	4.36	0
2022-01-02T14:00:00	5.96	0
2022-01-02T14:15:00	5.96	0
2022-01-02T14:30:00	7.3	0
2022-01-02T14:45:00	7.46	0
2022-01-02T15:00:00	7.65	0
2022-01-02T15:15:00	7.67	0
2022-01-02T15:30:00	8.35	0
2022-01-02T15:45:00	7.06	0
2022-01-02T16:00:00	7.66	0
2022-01-02T16:15:00	8.15	0
2022-01-02T16:30:00	7.79	0
2022-01-02T16:45:00	6.33	0
2022-01-02T17:00:00	8.89	0
2022-01-02T17:15:00	9.69	0
2022-01-02T17:30:00	7.56	0
2022-01-02T17:45:00	7.61	0
2022-01-02T18:00:00	7.02	0
2022-01-02T18:15:00	3.8	0
2022-01-02T18:30:00	2.25	0
2022-01-02T18:45:00	1.43	0
2022-01-02T19:00:00	0.23	0
2022-01-02T19:15:00	-0.45	0
2022-01-02T19:30:00	1.05	0
2022-01-02T19:45:00	0.1	0
2022-01-02T20:00:00	0.03	0
2022-01-02T20:15:00	1.12	0
2022-01-02T20:30:00	1.2	0
2022-01-02T20:45:00	1.22	0
2022-01-02T21:00:00	-0.56	0
2022-01-02T21:15:00	-1.86	0
2022-01-02T21:30:00	-3	0
2022-01-02T21:45:00	-4.4	0
2022-01-02T22:00:00	-4.91	0
2022-01-02T22:15:00	-5.16	0
2022-01-02T22:30:00	-5.77	0
2022-01-02T22:45:00	-5.73	0
2022-01-02T23:00:00	-6.63	0
2022-01-02T23:15:00	-6.44	0
2022-01-02T23:30:00	-5.95	0
2022-01-02T23:45:00	-6.15	0
2022-01-03T00:00:00	-6.3	0
2022-01-03T00:15:00	-6.13	0
2022-01-03T00:30:00	-5.75	0
2022-01-03T00:45:00	-5.69	0
2022-01-03T01:00:00	-5.89	0
2022-01-03T01:15:00	-5.97	0
2022-01-03T01:30:00	-5.8	0
2022-01-03T01:45:00	-6.01	0
2022-01-03T02:00:00	-6.5	0
2022-01-03T02:15:00	-6.48	0
2022-01-03T02:30:00	-6.56	0
2022-01-03T02:45:00	-6.76	0
2022-01-03T03:00:00	-6.58	0
2022-01-03T03:15:00	-6.85	0
2022-01-03T03:30:00	-6.83	0
2022-01-03T03:45:00	-6.98	0
2022-01-03T04:00:00	-7.08	0
2022-01-03T04:15:00	-7.14	0
2022-01-03T04:30:00	-7.28	0
2022-01-03T04:45:00	-7.45	0
2022-01-03T05:00:00	-7.31	0
2022-01-03T05:15:00	-7.28	0
2022-01-03T05:30:00	-7.56	0
2022-01-03T05:45:00	-7.19	0
2022-01-03T06:00:00	-7.52	0
2022-01-03T06:15:00	-7.53	0
2022-01-03T06:30:00	-7.14	0
2022-01-03T06:45:00	-7.14	0
2022-01-03T07:00:00	-7.24	0
2022-01-03T07:15:00	-6.84	0
2022-01-03T07:30:00	-6.82	0
2022-01-03T07:45:00	-6.9	0
2022-01-03T08:00:00	-6.87	0
2022-01-03T08:15:00	-7.29	0
2022-01-03T08:30:00	-7.53	0
2022-01-03T08:45:00	-7.62	0
2022-01-03T09:00:00	-6.98	0
2022-01-03T09:15:00	-6.95	0
2022-01-03T09:30:00	-6.94	0
2022-01-03T09:45:00	-6.78	0
2022-01-03T10:00:00	-6.31	0
2022-01-03T10:15:00	-5.74	0
2022-01-03T10:30:00	-5.11	0
2022-01-03T10:45:00	-4.52	0
2022-01-03T11:00:00	-3.93	0
2022-01-03T11:15:00	-3.52	0
2022-01-03T11:30:00	-3.08	0
2022-01-03T11:45:00	-2.85	0
2022-01-03T12:00:00	-2.62	0
2022-01-03T12:15:00	-2.42	0
2022-01-03T12:30:00	-2.17	0
2022-01-03T12:45:00	-1.75	0
2022-01-03T13:00:00	-0.91	0
2022-01-03T13:15:00	-0.63	0
2022-01-03T13:30:00	-0.2	0
2022-01-03T13:45:00	-0.74	0
2022-01-03T14:00:00	-0.07	0
2022-01-03T14:15:00	0.35	0
2022-01-03T14:30:00	0.13	0
2022-01-03T14:45:00	-0.19	0
2022-01-03T15:00:00	-0.17	0
2022-01-03T15:15:00	-0.31	0
2022-01-03T15:30:00	-0.24	0
2022-01-03T15:45:00	0.24	0
2022-01-03T16:00:00	0.75	0
2022-01-03T16:15:00	0.99	0
2022-01-03T16:30:00	0.62	0
2022-01-03T16:45:00	0.4	0
2022-01-03T17:00:00	0.44	0
2022-01-03T17:15:00	0.47	0
2022-01-03T17:30:00	0.58	0
2022-01-03T17:45:00	0.65	0
2022-01-03T18:00:00	0.32	0
2022-01-03T18:15:00	-0.09	0
2022-01-03T18:30:00	-0.3	0
2022-01-03T18:45:00	-0.49	0
2022-01-03T19:00:00	-0.84	0
2022-01-03T19:15:00	-0.82	0
2022-01-03T19:30:00	-0.69	0
2022-01-03T19:45:00	-0.8	0
2022-01-03T20:00:00	-0.8	0
2022-01-03T20:15:00	-1.01	0
2022-01-03T20:30:00	-1.22	0
2022-01-03T20:45:00	-1.01	0
2022-01-03T21:00:00	-1.39	0
2022-01-03T21:15:00	-2.13	0
2022-01-03T21:30:00	-2.79	0
2022-01-03T21:45:00	-2.34	0
2022-01-03T22:00:00	-2.29	0
2022-01-03T22:15:00	-2.79	0
2022-01-03T22:30:00	-2.78	0
2022-01-03T22:45:00	-4.41	0
2022-01-03T23:00:00	-4.5	0
2022-01-03T23:15:00	-5.34	0
2022-01-03T23:30:00	-5.94	0
2022-01-03T23:45:00	-6.33	0
2022-01-04T00:00:00	-7.57	0
2022-01-04T00:15:00	-6.98	0
2022-01-04T00:30:00	-7.09	0
2022-01-04T00:45:00	-7.09	0
2022-01-04T01:00:00	-6.74	0
2022-01-04T01:15:00	-6.5	0
2022-01-04T01:30:00	-6.43	0
2022-01-04T01:45:00	-7.27	0
2022-01-04T02:00:00	-6.95	0
2022-01-04T02:15:00	-6.55	0
2022-01-04T02:30:00	-6.69	0
2022-01-04T02:45:00	-6.96	0
2022-01-04T03:00:00	-7.12	0
2022-01-04T03:15:00	-7.13	0
2022-01-04T03:30:00	-7.63	0
2022-01-04T03:45:00	-8.02	0
2022-01-04T04:00:00	-7.83	0
2022-01-04T04:15:00	-7.38	0
2022-01-04T04:30:00	-7.5	0
2022-01-04T04:45:00	-8.31	0
2022-01-04T05:00:00	-8.62	0
2022-01-04T05:15:00	-8.44	0
2022-01-04T05:30:00	-8.47	0
2022-01-04T05:45:00	-8.58	0
2022-01-04T06:00:00	-8.8	0
2022-01-04T06:15:00	-8.84	0
2022-01-04T06:30:00	-8.97	0
2022-01-04T06:45:00	-9.1	0
2022-01-04T07:00:00	-9.29	0
2022-01-04T07:15:00	-9.65	0
2022-01-04T07:30:00	-9.65	0
2022-01-04T07:45:00	-10	0
2022-01-04T08:00:00	-10.1	0
2022-01-04T08:15:00	-10.08	0
2022-01-04T08:30:00	-10.15	0
2022-01-04T08:45:00	-10.01	0
2022-01-04T09:00:00	-10.23	0
2022-01-04T09:15:00	-10.43	0
2022-01-04T09:30:00	-10.18	0
2022-01-04T09:45:00	-9.65	0
2022-01-04T10:00:00	-9.4	0
2022-01-04T10:15:00	-9.22	0
2022-01-04T10:30:00	-8.88	0
2022-01-04T10:45:00	-8.35	0
2022-01-04T11:00:00	-7.81	0
2022-01-04T11:15:00	-7.24	0
2022-01-04T11:30:00	-6.76	0
2022-01-04T11:45:00	-6.35	0
2022-01-04T12:00:00	-5.56	0
2022-01-04T12:15:00	-5.08	0
2022-01-04T12:30:00	-4.52	0
2022-01-04T12:45:00	-3.88	0
2022-01-04T13:00:00	-3.13	0
2022-01-04T13:15:00	-0.71	0
2022-01-04T13:30:00	-0.07	0
2022-01-04T13:45:00	1.12	0
2022-01-04T14:00:00	2.03	0
2022-01-04T14:15:00	3.86	0
2022-01-04T14:30:00	5.31	0
2022-01-04T14:45:00	6.05	0
2022-01-04T15:00:00	5.96	0
2022-01-04T15:15:00	6.22	0
2022-01-04T15:30:00	6.01	0
2022-01-04T15:45:00	7.17	0
2022-01-04T16:00:00	7.35	0
2022-01-04T16:15:00	6.71	0
2022-01-04T16:30:00	6.4	0
2022-01-04T16:45:00	5.49	0
2022-01-04T17:00:00	6.69	0
2022-01-04T17:15:00	7.37	0
2022-01-04T17:30:00	5.96	0
2022-01-04T17:45:00	5.65	0
2022-01-04T18:00:00	4.77	0
2022-01-04T18:15:00	2.32	0
2022-01-04T18:30:00	1.28	0
2022-01-04T18:45:00	0.19	0
2022-01-04T19:00:00	-0.35	0
2022-01-04T19:15:00	-0.78	0
2022-01-04T19:30:00	-1.62	0
2022-01-04T19:45:00	-3.36	0
2022-01-04T20:00:00	-4.09	0
2022-01-04T20:15:00	-3.51	0
2022-01-04T20:30:00	-3.69	0
2022-01-04T20:45:00	-3.21	0
2022-01-04T21:00:00	-4.2	0
2022-01-04T21:15:00	-5.19	0
2022-01-04T21:30:00	-4.89	0
2022-01-04T21:45:00	-4.67	0
2022-01-04T22:00:00	-4.69	0
2022-01-04T22:15:00	-5.11	0
2022-01-04T22:30:00	-4.69	0
2022-01-04T22:45:00	-4.98	0
2022-01-04T23:00:00	-5.32	0
2022-01-04T23:15:00	-5.03	0
2022-01-04T23:30:00	-5.71	0
2022-01-04T23:45:00	-6.26	0
2022-01-05T00:00:00	-5.6	0
2022-01-05T00:15:00	-4.71	0
2022-01-05T00:30:00	-2.99	0
2022-01-05T00:45:00	-2.89	0
2022-01-05T01:00:00	-3.66	0
2022-01-05T01:15:00	-4.68	0
2022-01-05T01:30:00	-6.08	0
2022-01-05T01:45:00	-6.78	0
2022-01-05T02:00:00	-7.29	0
2022-01-05T02:15:00	-6.54	0
2022-01-05T02:30:00	-5.78	0
2022-01-05T02:45:00	-5.96	0
2022-01-05T03:00:00	-6.71	0
2022-01-05T03:15:00	-7.22	0
2022-01-05T03:30:00	-6.66	0
2022-01-05T03:45:00	-6.78	0
2022-01-05T04:00:00	-6.35	0
2022-01-05T04:15:00	-6	0
2022-01-05T04:30:00	-6.67	0
2022-01-05T04:45:00	-7.15	0
2022-01-05T05:00:00	-6.8	0
2022-01-05T05:15:00	-7.22	0
2022-01-05T05:30:00	-7.1	0
2022-01-05T05:45:00	-7.5	0
2022-01-05T06:00:00	-7.74	0
2022-01-05T06:15:00	-8.14	0
2022-01-05T06:30:00	-8.02	0
2022-01-05T06:45:00	-7.6	0
2022-01-05T07:00:00	-8.12	0
2022-01-05T07:15:00	-8.52	0
2022-01-05T07:30:00	-8.85	0
2022-01-05T07:45:00	-8.41	0
2022-01-05T08:00:00	-9.02	0
2022-01-05T08:15:00	-9.93	0
2022-01-05T08:30:00	-8.97	0
2022-01-05T08:45:00	-8.74	0
2022-01-05T09:00:00	-8.71	0
2022-01-05T09:15:00	-7.99	0
2022-01-05T09:30:00	-7.56	0
2022-01-05T09:45:00	-7.28	0
2022-01-05T10:00:00	-7.37	0
2022-01-05T10:15:00	-7.74	0
2022-01-05T10:30:00	-7	0
2022-01-05T10:45:00	-5.89	0
2022-01-05T11:00:00	-5.65	0
2022-01-05T11:15:00	-5.23	0
2022-01-05T11:30:00	-4.62	0
2022-01-05T11:45:00	-4.29	0
2022-01-05T12:00:00	-3.68	0
2022-01-05T12:15:00	-3.01	0
2022-01-05T12:30:00	-2.32	0
2022-01-05T12:45:00	-1.73	0
2022-01-05T13:00:00	-0.84	0
2022-01-05T13:15:00	1.3	0
2022-01-05T13:30:00	2.56	0
2022-01-05T13:45:00	3.6	0
2022-01-05T14:00:00	5.24	0
2022-01-05T14:15:00	5.01	0
2022-01-05T14:30:00	7.19	0
2022-01-05T14:45:00	8.36	0
2022-01-05T15:00:00	8.08	0
2022-01-05T15:15:00	8.02	0
2022-01-05T15:30:00	9.17	0
2022-01-05T15:45:00	9.12	0
2022-01-05T16:00:00	9.09	0
2022-01-05T16:15:00	6.79	0
2022-01-05T16:30:00	6.36	0
2022-01-05T16:45:00	6.13	0
2022-01-05T17:00:00	6.78	0
2022-01-05T17:15:00	8.11	0
2022-01-05T17:30:00	6.37	0
2022-01-05T17:45:00	5.96	0
2022-01-05T18:00:00	5.76	0
2022-01-05T18:15:00	4.97	0
2022-01-05T18:30:00	3.75	0
2022-01-05T18:45:00	2.28	0
2022-01-05T19:00:00	0.52	0
2022-01-05T19:15:00	-0.41	0
2022-01-05T19:30:00	-1.12	0
2022-01-05T19:45:00	-1.54	0
2022-01-05T20:00:00	-2.4	0
2022-01-05T20:15:00	-2.74	0
2022-01-05T20:30:00	-2.64	0
2022-01-05T20:45:00	-2.16	0
2022-01-05T21:00:00	-1.63	0
2022-01-05T21:15:00	-0.9	0
2022-01-05T21:30:00	-1.13	0
2022-01-05T21:45:00	-1.2	0
2022-01-05T22:00:00	-1.24	0
2022-01-05T22:15:00	-1.82	0
2022-01-05T22:30:00	-1.57	0
2022-01-05T22:45:00	-1.58	0
2022-01-05T23:00:00	-1.42	0
2022-01-05T23:15:00	-0.15	0
2022-01-05T23:30:00	-0.2	0
2022-01-05T23:45:00	0.12	0
2022-01-06T00:00:00	-0.79	0
2022-01-06T00:15:00	-2.38	0
2022-01-06T00:30:00	-3.23	0
2022-01-06T00:45:00	-1.68	0
2022-01-06T01:00:00	-2.33	0
2022-01-06T01:15:00	-3.64	0
2022-01-06T01:30:00	-3.55	0
2022-01-06T01:45:00	-3.83	0
2022-01-06T02:00:00	-3.87	0
2022-01-06T02:15:00	-3.95	0
2022-01-06T02:30:00	-4.72	0
2022-01-06T02:45:00	-4.67	0
2022-01-06T03:00:00	-4.82	0
2022-01-06T03:15:00	-4.99	0
2022-01-06T03:30:00	-5.23	0
2022-01-06T03:45:00	-4.76	0
2022-01-06T04:00:00	-4.85	0
2022-01-06T04:15:00	-4.9	0
2022-01-06T04:30:00	-5.06	0
2022-01-06T04:45:00	-5.23	0
2022-01-06T05:00:00	-6.02	0
2022-01-06T05:15:00	-6.89	0
2022-01-06T05:30:00	-6.68	0
2022-01-06T05:45:00	-6.95	0
2022-01-06T06:00:00	-6.22	0
2022-01-06T06:15:00	-6.06	0
2022-01-06T06:30:00	-6.32	0
2022-01-06T06:45:00	-6.31	0
2022-01-06T07:00:00	-6.49	0
2022-01-06T07:15:00	-7.01	0
2022-01-06T07:30:00	-6.46	0
2022-01-06T07:45:00	-6.54	0
2022-01-06T08:00:00	-7.11	0
2022-01-06T08:15:00	-7.89	0
2022-01-06T08:30:00	-7.6	0
2022-01-06T08:45:00	-7.3	0
2022-01-06T09:00:00	-6.83	0
2022-01-06T09:15:00	-6.97	0
2022-01-06T09:30:00	-6.93	0
2022-01-06T09:45:00	-6.69	0
2022-01-06T10:00:00	-5.72	0
2022-01-06T10:15:00	-4.95	0
2022-01-06T10:30:00	-4.56	0
2022-01-06T10:45:00	-4.13	0
2022-01-06T11:00:00	-3.6	0
2022-01-06T11:15:00	-3.13	0
2022-01-06T11:30:00	-2.69	0
2022-01-06T11:45:00	-2.06	0
2022-01-06T12:00:00	-1.46	0
2022-01-06T12:15:00	-0.78	0
2022-01-06T12:30:00	-0.21	0
2022-01-06T12:45:00	0.64	0
2022-01-06T13:00:00	1.32	0
2022-01-06T13:15:00	4.53	0
2022-01-06T13:30:00	5.46	0
2022-01-06T13:45:00	6.33	0
2022-01-06T14:00:00	8.92	0
2022-01-06T14:15:00	10.7	0
2022-01-06T14:30:00	10.12	0
2022-01-06T14:45:00	10.11	0
2022-01-06T15:00:00	9.69	0
2022-01-06T15:15:00	10.3	0
2022-01-06T15:30:00	9.35	0
2022-01-06T15:45:00	10.49	0
2022-01-06T16:00:00	11.44	0
2022-01-06T16:15:00	11.36	0
2022-01-06T16:30:00	11.94	0
2022-01-06T16:45:00	10.22	0
2022-01-06T17:00:00	10.14	0
2022-01-06T17:15:00	10.32	0
2022-01-06T17:30:00	9.82	0
2022-01-06T17:45:00	9.66	0
2022-01-06T18:00:00	8.99	0
2022-01-06T18:15:00	6.94	0
2022-01-06T18:30:00	5.68	0
2022-01-06T18:45:00	4.87	0
2022-01-06T19:00:00	4.27	0
2022-01-06T19:15:00	3.63	0
2022-01-06T19:30:00	3.85	0
2022-01-06T19:45:00	2.12	0
2022-01-06T20:00:00	0.07	0
2022-01-06T20:15:00	-0.64	0
2022-01-06T20:30:00	-1.38	0
2022-01-06T20:45:00	-0.9	0
2022-01-06T21:00:00	-0.49	0
2022-01-06T21:15:00	-0.92	0
2022-01-06T21:30:00	-1.58	0
2022-01-06T21:45:00	-1.22	0
2022-01-06T22:00:00	-2.19	0
2022-01-06T22:15:00	-2.55	0
2022-01-06T22:30:00	-3.06	0
2022-01-06T22:45:00	-3.19	0
2022-01-06T23:00:00	-3.75	0
2022-01-06T23:15:00	-4.07	0
2022-01-06T23:30:00	-3.3	0
2022-01-06T23:45:00	-2.87	0
2022-01-07T00:00:00	-3.19	0
2022-01-07T00:15:00	-3.43	0
2022-01-07T00:30:00	-3.47	0
2022-01-07T00:45:00	-3.35	0
2022-01-07T01:00:00	-3.74	0
2022-01-07T01:15:00	-4.23	0
2022-01-07T01:30:00	-4.54	0
2022-01-07T01:45:00	-4.89	0
2022-01-07T02:00:00	-3.73	0
2022-01-07T02:15:00	-3.72	0
2022-01-07T02:30:00	-3.34	0
2022-01-07T02:45:00	-3.95	0
2022-01-07T03:00:00	-4.22	0
2022-01-07T03:15:00	-4.62	0
2022-01-07T03:30:00	-5.22	0
2022-01-07T03:45:00	-5.43	0
2022-01-07T04:00:00	-5.23	0
2022-01-07T04:15:00	-5.28	0
2022-01-07T04:30:00	-5	0
2022-01-07T04:45:00	-4.46	0
2022-01-07T05:00:00	-4.53	0
2022-01-07T05:15:00	-4.16	0
2022-01-07T05:30:00	-4	0
2022-01-07T05:45:00	-5.02	0
2022-01-07T06:00:00	-5.41	0
2022-01-07T06:15:00	-6.4	0
2022-01-07T06:30:00	-5.82	0
2022-01-07T06:45:00	-4.92	0
2022-01-07T07:00:00	-4.87	0
2022-01-07T07:15:00	-5.07	0
2022-01-07T07:30:00	-5.04	0
2022-01-07T07:45:00	-5.05	0
2022-01-07T08:00:00	-4.67	0
2022-01-07T08:15:00	-5.02	0
2022-01-07T08:30:00	-5.46	0
2022-01-07T08:45:00	-5.79	0
2022-01-07T09:00:00	-5.62	0
2022-01-07T09:15:00	-5.37	0
2022-01-07T09:30:00	-5.2	0
2022-01-07T09:45:00	-4.64	0
2022-01-07T10:00:00	-4.5	0
2022-01-07T10:15:00	-4.23	0
2022-01-07T10:30:00	-3.93	0
2022-01-07T10:45:00	-3.31	0
2022-01-07T11:00:00	-2.7	0
2022-01-07T11:15:00	-2.07	0
2022-01-07T11:30:00	-1.63	0
2022-01-07T11:45:00	-1.27	0
2022-01-07T12:00:00	-0.29	0
2022-01-07T12:15:00	0.15	0
2022-01-07T12:30:00	0.72	0
2022-01-07T12:45:00	1.26	0
2022-01-07T13:00:00	2.15	0
2022-01-07T13:15:00	5.36	0
2022-01-07T13:30:00	7.59	0
2022-01-07T13:45:00	7.24	0
2022-01-07T14:00:00	9.4	0
2022-01-07T14:15:00	9.81	0
2022-01-07T14:30:00	9.36	0
2022-01-07T14:45:00	11.47	0
2022-01-07T15:00:00	11.65	0
2022-01-07T15:15:00	11.14	0
2022-01-07T15:30:00	11.75	0
2022-01-07T15:45:00	11.34	0
2022-01-07T16:00:00	9.97	0
2022-01-07T16:15:00	9.37	0
2022-01-07T16:30:00	9.34	0
2022-01-07T16:45:00	9.66	0
2022-01-07T17:00:00	9.55	0
2022-01-07T17:15:00	9.3	0
2022-01-07T17:30:00	9.42	0
2022-01-07T17:45:00	10.68	0
2022-01-07T18:00:00	10.06	0
2022-01-07T18:15:00	9.27	0
2022-01-07T18:30:00	8.44	0
2022-01-07T18:45:00	7.47	0
2022-01-07T19:00:00	5.77	0
2022-01-07T19:15:00	4.45	0
2022-01-07T19:30:00	4.43	0
2022-01-07T19:45:00	3.34	0
2022-01-07T20:00:00	3.8	0
2022-01-07T20:15:00	3.54	0
2022-01-07T20:30:00	2.45	0
2022-01-07T20:45:00	0.94	0
2022-01-07T21:00:00	-0.37	0
2022-01-07T21:15:00	-1.08	0
2022-01-07T21:30:00	-1.58	0
2022-01-07T21:45:00	-2.07	0
2022-01-07T22:00:00	-2.63	0
2022-01-07T22:15:00	-2.52	0
2022-01-07T22:30:00	-3.12	0
2022-01-07T22:45:00	-3.48	0
2022-01-07T23:00:00	-3.54	0
2022-01-07T23:15:00	-3.59	0
2022-01-07T23:30:00	-4.08	0
2022-01-07T23:45:00	-4.09	0
2022-01-08T00:00:00	-4.5	0
2022-01-08T00:15:00	-4.78	0
2022-01-08T00:30:00	-5.14	0
2022-01-08T00:45:00	-5.04	0
2022-01-08T01:00:00	-5.08	0
2022-01-08T01:15:00	-4.68	0
2022-01-08T01:30:00	-5.03	0
2022-01-08T01:45:00	-4.69	0
2022-01-08T02:00:00	-4.58	0
2022-01-08T02:15:00	-4.75	0
2022-01-08T02:30:00	-5.7	0
2022-01-08T02:45:00	-6.12	0
2022-01-08T03:00:00	-6.22	0
2022-01-08T03:15:00	-5.55	0
2022-01-08T03:30:00	-5.09	0
2022-01-08T03:45:00	-5.49	0
2022-01-08T04:00:00	-5.93	0
2022-01-08T04:15:00	-6.09	0
2022-01-08T04:30:00	-4.28	0
2022-01-08T04:45:00	-3.3	0
2022-01-08T05:00:00	-4.37	0
2022-01-08T05:15:00	-5.32	0
2022-01-08T05:30:00	-5.45	0
2022-01-08T05:45:00	-3.56	0
2022-01-08T06:00:00	-3.39	0
2022-01-08T06:15:00	-3.9	0
2022-01-08T06:30:00	-4.42	0
2022-01-08T06:45:00	-5.04	0
2022-01-08T07:00:00	-5.28	0
2022-01-08T07:15:00	-5.07	0
2022-01-08T07:30:00	-5.27	0
2022-01-08T07:45:00	-5.74	0
2022-01-08T08:00:00	-4.91	0
2022-01-08T08:15:00	-4.29	0
2022-01-08T08:30:00	-4.99	0
2022-01-08T08:45:00	-4.41	0
2022-01-08T09:00:00	-3.9	0
2022-01-08T09:15:00	-3.68	0
2022-01-08T09:30:00	-3.94	0
2022-01-08T09:45:00	-3.97	0
2022-01-08T10:00:00	-2.94	0
2022-01-08T10:15:00	-2.58	0
2022-01-08T10:30:00	-2.48	0
2022-01-08T10:45:00	-2.21	0
2022-01-08T11:00:00	-1.74	0
2022-01-08T11:15:00	-1.08	0
2022-01-08T11:30:00	-0.55	0
2022-01-08T11:45:00	0.14	0
2022-01-08T12:00:00	0.61	0
2022-01-08T12:15:00	1.22	0
2022-01-08T12:30:00	1.78	0
2022-01-08T12:45:00	2.4	0
2022-01-08T13:00:00	3.15	0
2022-01-08T13:15:00	5.8	0
2022-01-08T13:30:00	6.77	0
2022-01-08T13:45:00	7.2	0
2022-01-08T14:00:00	8.88	0
2022-01-08T14:15:00	9.52	0
2022-01-08T14:30:00	11.17	0
2022-01-08T14:45:00	12.25	0
2022-01-08T15:00:00	12.17	0
2022-01-08T15:15:00	12.56	0
2022-01-08T15:30:00	12.91	0
2022-01-08T15:45:00	13.19	0
2022-01-08T16:00:00	13.46	0
2022-01-08T16:15:00	14.06	0
2022-01-08T16:30:00	14.27	0
2022-01-08T16:45:00	11.03	0
2022-01-08T17:00:00	12.81	0
2022-01-08T17:15:00	14.18	0
2022-01-08T17:30:00	12.47	0
2022-01-08T17:45:00	10.75	0
2022-01-08T18:00:00	10.87	0
2022-01-08T18:15:00	7.97	0
2022-01-08T18:30:00	6.47	0
2022-01-08T18:45:00	5.88	0
2022-01-08T19:00:00	4.62	0
2022-01-08T19:15:00	3.63	0
2022-01-08T19:30:00	2.13	0
2022-01-08T19:45:00	1.3	0
2022-01-08T20:00:00	0.27	0
2022-01-08T20:15:00	-0.8	0
2022-01-08T20:30:00	-0.64	0
2022-01-08T20:45:00	-1.04	0
2022-01-08T21:00:00	-1.2	0
2022-01-08T21:15:00	-1.57	0
2022-01-08T21:30:00	-0.4	0
2022-01-08T21:45:00	-0.89	0
2022-01-08T22:00:00	-1	0
2022-01-08T22:15:00	-0.57	0
2022-01-08T22:30:00	0.66	0
2022-01-08T22:45:00	1.65	0
2022-01-08T23:00:00	2.37	0
2022-01-08T23:15:00	2.49	0
2022-01-08T23:30:00	2.67	0
2022-01-08T23:45:00	2.8	0
2022-01-09T00:00:00	2.67	0
2022-01-09T00:15:00	2.14	0
2022-01-09T00:30:00	2.05	0
2022-01-09T00:45:00	1.95	0
2022-01-09T01:00:00	1.42	0
2022-01-09T01:15:00	1.45	0
2022-01-09T01:30:00	0.76	0
2022-01-09T01:45:00	-0.59	0
2022-01-09T02:00:00	-1.05	0
2022-01-09T02:15:00	-1.31	0
2022-01-09T02:30:00	-1.03	0
2022-01-09T02:45:00	-1.63	0
2022-01-09T03:00:00	-2.19	0
2022-01-09T03:15:00	-2.01	0
2022-01-09T03:30:00	-1.91	0
2022-01-09T03:45:00	-1.97	0
2022-01-09T04:00:00	-2.14	0
2022-01-09T04:15:00	-2.36	0
2022-01-09T04:30:00	-2.78	0
2022-01-09T04:45:00	-3.2	0
2022-01-09T05:00:00	-3.33	0
2022-01-09T05:15:00	-3.24	0
2022-01-09T05:30:00	-3.42	0
2022-01-09T05:45:00	-3.4	0
2022-01-09T06:00:00	-3.73	0
2022-01-09T06:15:00	-3.62	0
2022-01-09T06:30:00	-3.89	0
2022-01-09T06:45:00	-4.28	0
2022-01-09T07:00:00	-4.39	0
2022-01-09T07:15:00	-4.64	0
2022-01-09T07:30:00	-4.85	0
2022-01-09T07:45:00	-5.02	0
2022-01-09T08:00:00	-5.6	0
2022-01-09T08:15:00	-5.86	0
2022-01-09T08:30:00	-5.79	0
2022-01-09T08:45:00	-5.12	0
2022-01-09T09:00:00	-4.64	0
2022-01-09T09:15:00	-4.75	0
2022-01-09T09:30:00	-5.03	0
2022-01-09T09:45:00	-4.88	0
2022-01-09T10:00:00	-4.47	0
2022-01-09T10:15:00	-3.96	0
2022-01-09T10:30:00	-3.35	0
2022-01-09T10:45:00	-2.89	0
2022-01-09T11:00:00	-2.42	0
2022-01-09T11:15:00	-1.88	0
2022-01-09T11:30:00	-1.35	0
2022-01-09T11:45:00	-0.73	0
2022-01-09T12:00:00	0	0
2022-01-09T12:15:00	0.58	0
2022-01-09T12:30:00	1.34	0
2022-01-09T12:45:00	2.16	0
2022-01-09T13:00:00	3.4	0
2022-01-09T13:15:00	5.88	0
2022-01-09T13:30:00	7.6	0
2022-01-09T13:45:00	8.11	0
2022-01-09T14:00:00	9.71	0
2022-01-09T14:15:00	10.21	0
2022-01-09T14:30:00	9.72	0
2022-01-09T14:45:00	10.01	0
2022-01-09T15:00:00	12.05	0
2022-01-09T15:15:00	12.55	0
2022-01-09T15:30:00	11.97	0
2022-01-09T15:45:00	13.26	0
2022-01-09T16:00:00	11.41	0
2022-01-09T16:15:00	10.05	0
2022-01-09T16:30:00	9.8	0
2022-01-09T16:45:00	10.04	0
2022-01-09T17:00:00	9.31	0
2022-01-09T17:15:00	8.96	0
2022-01-09T17:30:00	8.73	0
2022-01-09T17:45:00	8.42	0
2022-01-09T18:00:00	8.77	0
2022-01-09T18:15:00	8.82	0
2022-01-09T18:30:00	7.79	0
2022-01-09T18:45:00	6.94	0
2022-01-09T19:00:00	5.94	0
2022-01-09T19:15:00	5.44	0
2022-01-09T19:30:00	5.01	0
2022-01-09T19:45:00	4.73	0
2022-01-09T20:00:00	3.97	0
2022-01-09T20:15:00	2.62	0
2022-01-09T20:30:00	3.07	0
2022-01-09T20:45:00	3	0
2022-01-09T21:00:00	2.28	0
2022-01-09T21:15:00	1.41	0
2022-01-09T21:30:00	0.41	0
2022-01-09T21:45:00	-0.13	0
2022-01-09T22:00:00	0.41	0
2022-01-09T22:15:00	-0.1	0
2022-01-09T22:30:00	0.14	0
2022-01-09T22:45:00	0.62	0
2022-01-09T23:00:00	0.49	0
2022-01-09T23:15:00	0.72	0
2022-01-09T23:30:00	1.42	0
2022-01-09T23:45:00	0.65	0
2022-01-10T00:00:00	0.39	0
2022-01-10T00:15:00	-0.27	0
2022-01-10T00:30:00	-0.82	0
2022-01-10T00:45:00	0.54	0
2022-01-10T01:00:00	-0.22	0
2022-01-10T01:15:00	0.55	0
2022-01-10T01:30:00	0.87	0
2022-01-10T01:45:00	0.79	0
2022-01-10T02:00:00	0.96	0
2022-01-10T02:15:00	0.52	0
2022-01-10T02:30:00	-0.39	0
2022-01-10T02:45:00	-0.85	0
2022-01-10T03:00:00	-1.03	0
2022-01-10T03:15:00	-1.18	0
2022-01-10T03:30:00	-1.72	0
2022-01-10T03:45:00	-1.15	0
2022-01-10T04:00:00	-1.49	0
2022-01-10T04:15:00	-1.48	0
2022-01-10T04:30:00	-1.59	0
2022-01-10T04:45:00	-1.9	0
2022-01-10T05:00:00	-1.87	0
2022-01-10T05:15:00	-1.84	0
2022-01-10T05:30:00	-2.18	0
2022-01-10T05:45:00	-2.33	0
2022-01-10T06:00:00	-2.67	0
2022-01-10T06:15:00	-2.97	0
2022-01-10T06:30:00	-3.08	0
2022-01-10T06:45:00	-2.67	0
2022-01-10T07:00:00	-2.79	0
2022-01-10T07:15:00	-3.05	0
2022-01-10T07:30:00	-3.36	0
2022-01-10T07:45:00	-3.5	0
2022-01-10T08:00:00	-3.53	0
2022-01-10T08:15:00	-3.54	0
2022-01-10T08:30:00	-3.66	0
2022-01-10T08:45:00	-3.94	0
2022-01-10T09:00:00	-4.26	0
2022-01-10T09:15:00	-4.28	0
2022-01-10T09:30:00	-4.1	0
2022-01-10T09:45:00	-3.64	0
2022-01-10T10:00:00	-3.4	0
2022-01-10T10:15:00	-3.08	0
2022-01-10T10:30:00	-2.37	0
2022-01-10T10:45:00	-1.81	0
2022-01-10T11:00:00	-1.25	0
2022-01-10T11:15:00	-0.85	0
2022-01-10T11:30:00	-0.04	0
2022-01-10T11:45:00	0.56	0
2022-01-10T12:00:00	0.62	0
2022-01-10T12:15:00	0.96	0
2022-01-10T12:30:00	1.56	0
2022-01-10T12:45:00	2.11	0
2022-01-10T13:00:00	2.88	0
2022-01-10T13:15:00	5.39	0
2022-01-10T13:30:00	7.87	0
2022-01-10T13:45:00	8.85	0
2022-01-10T14:00:00	10.42	0
2022-01-10T14:15:00	11.27	0
2022-01-10T14:30:00	11.23	0
2022-01-10T14:45:00	9.85	0
2022-01-10T15:00:00	9.65	0
2022-01-10T15:15:00	9.45	0
2022-01-10T15:30:00	10.23	0
2022-01-10T15:45:00	10.5	0
2022-01-10T16:00:00	11.92	0
2022-01-10T16:15:00	11.8	0
2022-01-10T16:30:00	12.77	0
2022-01-10T16:45:00	10.27	0
2022-01-10T17:00:00	11.27	0
2022-01-10T17:15:00	12.39	0
2022-01-10T17:30:00	10.83	0
2022-01-10T17:45:00	7.74	0
2022-01-10T18:00:00	6.91	0
2022-01-10T18:15:00	6.27	0
2022-01-10T18:30:00	5.79	0
2022-01-10T18:45:00	4.88	0
2022-01-10T19:00:00	3.64	0
2022-01-10T19:15:00	3.04	0
2022-01-10T19:30:00	2.64	0
2022-01-10T19:45:00	2.48	0
2022-01-10T20:00:00	2.2	0
2022-01-10T20:15:00	1.84	0
2022-01-10T20:30:00	1.2	0
2022-01-10T20:45:00	0.64	0
2022-01-10T21:00:00	0.22	0
2022-01-10T21:15:00	0.9	0
2022-01-10T21:30:00	0.39	0
2022-01-10T21:45:00	-0.32	0
2022-01-10T22:00:00	0.24	0
2022-01-10T22:15:00	0.19	0
2022-01-10T22:30:00	-0.17	0
2022-01-10T22:45:00	0.11	0
2022-01-10T23:00:00	-0.43	0
2022-01-10T23:15:00	-0.25	0
2022-01-10T23:30:00	0.66	0
2022-01-10T23:45:00	-0.07	0
2022-01-11T00:00:00	0.21	0
2022-01-11T00:15:00	0.03	0
2022-01-11T00:30:00	-0.85	0
2022-01-11T00:45:00	-0.04	0
2022-01-11T01:00:00	1.15	0
2022-01-11T01:15:00	1.19	0
2022-01-11T01:30:00	0.08	0
2022-01-11T01:45:00	0.18	0
2022-01-11T02:00:00	-0.83	0
2022-01-11T02:15:00	-1.82	0
2022-01-11T02:30:00	-2.09	0
2022-01-11T02:45:00	-2.24	0
2022-01-11T03:00:00	-2.1	0
2022-01-11T03:15:00	-2.88	0
2022-01-11T03:30:00	-3.43	0
2022-01-11T03:45:00	-4.36	0
2022-01-11T04:00:00	-5.23	0
2022-01-11T04:15:00	-5.26	0
2022-01-11T04:30:00	-5.38	0
2022-01-11T04:45:00	-4.89	0
2022-01-11T05:00:00	-4.23	0
2022-01-11T05:15:00	-4.62	0
2022-01-11T05:30:00	-4.53	0
2022-01-11T05:45:00	-3.2	0
2022-01-11T06:00:00	-3.34	0
2022-01-11T06:15:00	-4.19	0
2022-01-11T06:30:00	-4.52	0
2022-01-11T06:45:00	-3.13	0
2022-01-11T07:00:00	-2.89	0
2022-01-11T07:15:00	-3.67	0
2022-01-11T07:30:00	-4.53	0
2022-01-11T07:45:00	-4.72	0
2022-01-11T08:00:00	-4.76	0
2022-01-11T08:15:00	-4.99	0
2022-01-11T08:30:00	-5.4	0
2022-01-11T08:45:00	-5.66	0
2022-01-11T09:00:00	-6.01	0
2022-01-11T09:15:00	-5.96	0
2022-01-11T09:30:00	-5.68	0
2022-01-11T09:45:00	-5.37	0
2022-01-11T10:00:00	-4.86	0
2022-01-11T10:15:00	-4.41	0
2022-01-11T10:30:00	-3.72	0
2022-01-11T10:45:00	-2.85	0
2022-01-11T11:00:00	-1.9	0
2022-01-11T11:15:00	-1.55	0
2022-01-11T11:30:00	-0.69	0
2022-01-11T11:45:00	0.09	0
2022-01-11T12:00:00	0.97	0
2022-01-11T12:15:00	1.7	0
2022-01-11T12:30:00	2.16	0
2022-01-11T12:45:00	2.67	0
2022-01-11T13:00:00	3.7	0
2022-01-11T13:15:00	5.81	0
2022-01-11T13:30:00	6.58	0
2022-01-11T13:45:00	6.93	0
2022-01-11T14:00:00	7.59	0
2022-01-11T14:15:00	8.74	0
2022-01-11T14:30:00	8.46	0
2022-01-11T14:45:00	10.2	0
2022-01-11T15:00:00	11.67	0
2022-01-11T15:15:00	10.4	0
2022-01-11T15:30:00	11.49	0
2022-01-11T15:45:00	11.33	0
2022-01-11T16:00:00	10.32	0
2022-01-11T16:15:00	10.27	0
2022-01-11T16:30:00	9.95	0
2022-01-11T16:45:00	9.15	0
2022-01-11T17:00:00	10.98	0
2022-01-11T17:15:00	11.05	0
2022-01-11T17:30:00	9.86	0
2022-01-11T17:45:00	9.76	0
2022-01-11T18:00:00	9.29	0
2022-01-11T18:15:00	7.6	0
2022-01-11T18:30:00	6.71	0
2022-01-11T18:45:00	6.01	0
2022-01-11T19:00:00	4.9	0
2022-01-11T19:15:00	3.59	0
2022-01-11T19:30:00	2.99	0
2022-01-11T19:45:00	1.99	0
2022-01-11T20:00:00	1.23	0
2022-01-11T20:15:00	0.84	0
2022-01-11T20:30:00	1.09	0
2022-01-11T20:45:00	0.95	0
2022-01-11T21:00:00	0.23	0
2022-01-11T21:15:00	-0.43	0
2022-01-11T21:30:00	-0.13	0
2022-01-11T21:45:00	0.47	0
2022-01-11T22:00:00	0.25	0
2022-01-11T22:15:00	0.33	0
2022-01-11T22:30:00	0.1	0
2022-01-11T22:45:00	1.04	0
2022-01-11T23:00:00	0.66	0
2022-01-11T23:15:00	1.14	0
2022-01-11T23:30:00	1.42	0
2022-01-11T23:45:00	1.23	0
2022-01-12T00:00:00	1.61	0
2022-01-12T00:15:00	2.22	0
2022-01-12T00:30:00	3.77	0
2022-01-12T00:45:00	3.77	0
2022-01-12T01:00:00	3.5	0
2022-01-12T01:15:00	3.18	0
2022-01-12T01:30:00	2.68	0
2022-01-12T01:45:00	3.2	0
2022-01-12T02:00:00	2.97	0
2022-01-12T02:15:00	2.2	0
2022-01-12T02:30:00	1.65	0
2022-01-12T02:45:00	1.24	0
2022-01-12T03:00:00	0.27	0
2022-01-12T03:15:00	0.42	0
2022-01-12T03:30:00	0.98	0
2022-01-12T03:45:00	0.85	0
2022-01-12T04:00:00	0.72	0
2022-01-12T04:15:00	-0.02	0
2022-01-12T04:30:00	-0.01	0
2022-01-12T04:45:00	-0.33	0
2022-01-12T05:00:00	-0.59	0
2022-01-12T05:15:00	-0.8	0
2022-01-12T05:30:00	-0.76	0
2022-01-12T05:45:00	-0.89	0
2022-01-12T06:00:00	-1.23	0
2022-01-12T06:15:00	-1.44	0
2022-01-12T06:30:00	-1.75	0
2022-01-12T06:45:00	-2.38	0
2022-01-12T07:00:00	-2.82	0
2022-01-12T07:15:00	-3.56	0
2022-01-12T07:30:00	-3.29	0
2022-01-12T07:45:00	-2.92	0
2022-01-12T08:00:00	-2.67	0
2022-01-12T08:15:00	-2.15	0
2022-01-12T08:30:00	-2.71	0
2022-01-12T08:45:00	-2.89	0
2022-01-12T09:00:00	-2.99	0
2022-01-12T09:15:00	-3.23	0
2022-01-12T09:30:00	-2.75	0
2022-01-12T09:45:00	-2.3	0
2022-01-12T10:00:00	-1.86	0
2022-01-12T10:15:00	-0.86	0
2022-01-12T10:30:00	1.23	0
2022-01-12T10:45:00	1.8	0
2022-01-12T11:00:00	2.56	0
2022-01-12T11:15:00	2.79	0
2022-01-12T11:30:00	2.72	0
2022-01-12T11:45:00	2.63	0
2022-01-12T12:00:00	2.82	0
2022-01-12T12:15:00	2.95	0
2022-01-12T12:30:00	3.15	0
2022-01-12T12:45:00	3.62	0
2022-01-12T13:00:00	4.22	0
2022-01-12T13:15:00	5.68	0
2022-01-12T13:30:00	6.38	0
2022-01-12T13:45:00	6.97	0
2022-01-12T14:00:00	9.09	0
2022-01-12T14:15:00	8.52	0
2022-01-12T14:30:00	8.68	0
2022-01-12T14:45:00	9.07	0
2022-01-12T15:00:00	8.67	0
2022-01-12T15:15:00	7.7	0
2022-01-12T15:30:00	6.9	0
2022-01-12T15:45:00	6.54	0
2022-01-12T16:00:00	6.59	0
2022-01-12T16:15:00	7.96	0
2022-01-12T16:30:00	6.98	0
2022-01-12T16:45:00	7.05	0
2022-01-12T17:00:00	7.86	0
2022-01-12T17:15:00	6.42	0
2022-01-12T17:30:00	6.22	0
2022-01-12T17:45:00	5.74	0
2022-01-12T18:00:00	5.57	0
2022-01-12T18:15:00	5.15	0
2022-01-12T18:30:00	4.83	0
2022-01-12T18:45:00	4.69	0
2022-01-12T19:00:00	4.5	0
2022-01-12T19:15:00	4.06	0
2022-01-12T19:30:00	4.09	0
2022-01-12T19:45:00	3.8	0
2022-01-12T20:00:00	3.3	0
2022-01-12T20:15:00	2.92	0
2022-01-12T20:30:00	3.2	0
2022-01-12T20:45:00	2.89	0
2022-01-12T21:00:00	2.88	0
2022-01-12T21:15:00	2.59	0
2022-01-12T21:30:00	2.78	0
2022-01-12T21:45:00	2.63	0
2022-01-12T22:00:00	2.43	0
2022-01-12T22:15:00	2.14	0
2022-01-12T22:30:00	2.29	0
2022-01-12T22:45:00	2.35	0
2022-01-12T23:00:00	2.48	0
2022-01-12T23:15:00	2.21	0
2022-01-12T23:30:00	2.43	0
2022-01-12T23:45:00	2.18	0
2022-01-13T00:00:00	2.13	0
2022-01-13T00:15:00	1.89	0
2022-01-13T00:30:00	1.59	0
2022-01-13T00:45:00	1.23	0
2022-01-13T01:00:00	0.88	0
2022-01-13T01:15:00	0.99	0
2022-01-13T01:30:00	0.98	0
2022-01-13T01:45:00	0.45	0
2022-01-13T02:00:00	0.22	0
2022-01-13T02:15:00	0.02	0
2022-01-13T02:30:00	-0.76	0
2022-01-13T02:45:00	-1.05	0
2022-01-13T03:00:00	-1.25	0
2022-01-13T03:15:00	-1.34	0
2022-01-13T03:30:00	-1.4	0
2022-01-13T03:45:00	-2.18	0
2022-01-13T04:00:00	-3.01	0
2022-01-13T04:15:00	-3.65	0
2022-01-13T04:30:00	-3.72	0
2022-01-13T04:45:00	-3.79	0
2022-01-13T05:00:00	-4.46	0
2022-01-13T05:15:00	-4.67	0
2022-01-13T05:30:00	-4.45	0
2022-01-13T05:45:00	-4.06	0
2022-01-13T06:00:00	-3.45	0
2022-01-13T06:15:00	-3.3	0
2022-01-13T06:30:00	-3.63	0
2022-01-13T06:45:00	-3.67	0
2022-01-13T07:00:00	-3.62	0
2022-01-13T07:15:00	-3.71	0
2022-01-13T07:30:00	-4.17	0
2022-01-13T07:45:00	-4.58	0
2022-01-13T08:00:00	-4.66	0
2022-01-13T08:15:00	-4.85	0
2022-01-13T08:30:00	-5.48	0
2022-01-13T08:45:00	-5.16	0
2022-01-13T09:00:00	-4.62	0
2022-01-13T09:15:00	-4.69	0
2022-01-13T09:30:00	-3.56	0
2022-01-13T09:45:00	-2.31	0
2022-01-13T10:00:00	-1.8	0
2022-01-13T10:15:00	-1.57	0
2022-01-13T10:30:00	-1.39	0
2022-01-13T10:45:00	-1.33	0
2022-01-13T11:00:00	-1.1	0
2022-01-13T11:15:00	-0.99	0
2022-01-13T11:30:00	-0.78	0
2022-01-13T11:45:00	-0.18	0
2022-01-13T12:00:00	0.4	0
2022-01-13T12:15:00	0.83	0
2022-01-13T12:30:00	1.58	0
2022-01-13T12:45:00	1.51	0
2022-01-13T13:00:00	1.65	0
2022-01-13T13:15:00	4.48	0
2022-01-13T13:30:00	5.8	0
2022-01-13T13:45:00	5.35	0
2022-01-13T14:00:00	5.8	0
2022-01-13T14:15:00	4.41	0
2022-01-13T14:30:00	5.27	0
2022-01-13T14:45:00	6.73	0
2022-01-13T15:00:00	7.37	0
2022-01-13T15:15:00	5.2	0
2022-01-13T15:30:00	3.36	0
2022-01-13T15:45:00	3.25	0
2022-01-13T16:00:00	3.33	0
2022-01-13T16:15:00	2.75	0
2022-01-13T16:30:00	2.83	0
2022-01-13T16:45:00	3.74	0
2022-01-13T17:00:00	5.34	0
2022-01-13T17:15:00	4.76	0
2022-01-13T17:30:00	4.27	0
2022-01-13T17:45:00	5.25	0
2022-01-13T18:00:00	5.28	0
2022-01-13T18:15:00	4.1	0
2022-01-13T18:30:00	2.27	0
2022-01-13T18:45:00	1.58	0
2022-01-13T19:00:00	0.85	0
2022-01-13T19:15:00	0.14	0
2022-01-13T19:30:00	-0.13	0
2022-01-13T19:45:00	-0.24	0
2022-01-13T20:00:00	-1.2	0
2022-01-13T20:15:00	-2.29	0
2022-01-13T20:30:00	-1.59	0
2022-01-13T20:45:00	-1.26	0
2022-01-13T21:00:00	-2.05	0
2022-01-13T21:15:00	-2.7	0
2022-01-13T21:30:00	-3.49	0
2022-01-13T21:45:00	-3.49	0
2022-01-13T22:00:00	-3.53	0
2022-01-13T22:15:00	-4.84	0
2022-01-13T22:30:00	-5.79	0
2022-01-13T22:45:00	-3.33	0
2022-01-13T23:00:00	-3.18	0
2022-01-13T23:15:00	-3.07	0
2022-01-13T23:30:00	-2.48	0
2022-01-13T23:45:00	-2.78	0
2022-01-14T00:00:00	-3.57	0
2022-01-14T00:15:00	-4.73	0
2022-01-14T00:30:00	-5.16	0
2022-01-14T00:45:00	-5.19	0
2022-01-14T01:00:00	-5.23	0
2022-01-14T01:15:00	-5.37	0
2022-01-14T01:30:00	-5.93	0
2022-01-14T01:45:00	-6.25	0
2022-01-14T02:00:00	-6.26	0
2022-01-14T02:15:00	-6.71	0
2022-01-14T02:30:00	-7.42	0
2022-01-14T02:45:00	-6.73	0
2022-01-14T03:00:00	-7.48	0
2022-01-14T03:15:00	-6.51	0
2022-01-14T03:30:00	-5.7	0
2022-01-14T03:45:00	-5.84	0
2022-01-14T04:00:00	-6.35	0
2022-01-14T04:15:00	-6.76	0
2022-01-14T04:30:00	-7.42	0
2022-01-14T04:45:00	-7.92	0
2022-01-14T05:00:00	-6.71	0
2022-01-14T05:15:00	-6.86	0
2022-01-14T05:30:00	-7.09	0
2022-01-14T05:45:00	-7.17	0
2022-01-14T06:00:00	-7.22	0
2022-01-14T06:15:00	-7.6	0
2022-01-14T06:30:00	-7.34	0
2022-01-14T06:45:00	-7.56	0
2022-01-14T07:00:00	-7.91	0
2022-01-14T07:15:00	-7.68	0
2022-01-14T07:30:00	-7.98	0
2022-01-14T07:45:00	-7.9	0
2022-01-14T08:00:00	-8.14	0
2022-01-14T08:15:00	-8.17	0
2022-01-14T08:30:00	-8.49	0
2022-01-14T08:45:00	-8.95	0
2022-01-14T09:00:00	-8.92	0
2022-01-14T09:15:00	-8.72	0
2022-01-14T09:30:00	-8.54	0
2022-01-14T09:45:00	-8.29	0
2022-01-14T10:00:00	-7.99	0
2022-01-14T10:15:00	-7.42	0
2022-01-14T10:30:00	-6.82	0
2022-01-14T10:45:00	-6.36	0
2022-01-14T11:00:00	-5.85	0
2022-01-14T11:15:00	-5.39	0
2022-01-14T11:30:00	-4.89	0
2022-01-14T11:45:00	-4.45	0
2022-01-14T12:00:00	-3.71	0
2022-01-14T12:15:00	-3.13	0
2022-01-14T12:30:00	-2.28	0
2022-01-14T12:45:00	-1.65	0
2022-01-14T13:00:00	-0.8	0
2022-01-14T13:15:00	2.62	0
2022-01-14T13:30:00	5.29	0
2022-01-14T13:45:00	4.3	0
2022-01-14T14:00:00	5.5	0
2022-01-14T14:15:00	6.56	0
2022-01-14T14:30:00	6.09	0
2022-01-14T14:45:00	7	0
2022-01-14T15:00:00	6.9	0
2022-01-14T15:15:00	7.19	0
2022-01-14T15:30:00	7.44	0
2022-01-14T15:45:00	7.92	0
2022-01-14T16:00:00	8.48	0
2022-01-14T16:15:00	9.53	0
2022-01-14T16:30:00	8.94	0
2022-01-14T16:45:00	8.19	0
2022-01-14T17:00:00	9.9	0
2022-01-14T17:15:00	9	0
2022-01-14T17:30:00	7.5	0
2022-01-14T17:45:00	5.93	0
2022-01-14T18:00:00	5.3	0
2022-01-14T18:15:00	4.92	0
2022-01-14T18:30:00	4.85	0
2022-01-14T18:45:00	4.8	0
2022-01-14T19:00:00	3.98	0
2022-01-14T19:15:00	2.88	0
2022-01-14T19:30:00	2.4	0
2022-01-14T19:45:00	1.71	0
2022-01-14T20:00:00	0.59	0
2022-01-14T20:15:00	0.07	0
2022-01-14T20:30:00	0.69	0
2022-01-14T20:45:00	0.82	0
2022-01-14T21:00:00	0.01	0
2022-01-14T21:15:00	-0.9	0
2022-01-14T21:30:00	-1.49	0
2022-01-14T21:45:00	-1.23	0
2022-01-14T22:00:00	-1.58	0
2022-01-14T22:15:00	-2.39	0
2022-01-14T22:30:00	-3.13	0
2022-01-14T22:45:00	-2.86	0
2022-01-14T23:00:00	-2.98	0
2022-01-14T23:15:00	-2.74	0
2022-01-14T23:30:00	-2.27	0
2022-01-14T23:45:00	-2	0
2022-01-15T00:00:00	-1.63	0
2022-01-15T00:15:00	-1.51	0
2022-01-15T00:30:00	-1.27	0
2022-01-15T00:45:00	-1.37	0
2022-01-15T01:00:00	-0.8	0
2022-01-15T01:15:00	0.77	0
2022-01-15T01:30:00	0.61	0
2022-01-15T01:45:00	-0.39	0
2022-01-15T02:00:00	-0.69	0
2022-01-15T02:15:00	-1.15	0
2022-01-15T02:30:00	-1.12	0
2022-01-15T02:45:00	-0.65	0
2022-01-15T03:00:00	-1.64	0
2022-01-15T03:15:00	-2.69	0
2022-01-15T03:30:00	-2.93	0
2022-01-15T03:45:00	-1.89	0
2022-01-15T04:00:00	-2.54	0
2022-01-15T04:15:00	-3.13	0
2022-01-15T04:30:00	-3.57	0
2022-01-15T04:45:00	-3.99	0
2022-01-15T05:00:00	-3.86	0
2022-01-15T05:15:00	-3.89	0
2022-01-15T05:30:00	-4.81	0
2022-01-15T05:45:00	-5.44	0
2022-01-15T06:00:00	-5.77	0
2022-01-15T06:15:00	-5.8	0
2022-01-15T06:30:00	-5.33	0
2022-01-15T06:45:00	-4.74	0
2022-01-15T07:00:00	-4.6	0
2022-01-15T07:15:00	-5.2	0
2022-01-15T07:30:00	-5.23	0
2022-01-15T07:45:00	-5.59	0
2022-01-15T08:00:00	-6.07	0
2022-01-15T08:15:00	-5.95	0
2022-01-15T08:30:00	-6.2	0
2022-01-15T08:45:00	-6.8	0
2022-01-15T09:00:00	-6.62	0
2022-01-15T09:15:00	-5.95	0
2022-01-15T09:30:00	-4.59	0
2022-01-15T09:45:00	-4.52	0
2022-01-15T10:00:00	-4.67	0
2022-01-15T10:15:00	-4.23	0
2022-01-15T10:30:00	-3.86	0
2022-01-15T10:45:00	-3.41	0
2022-01-15T11:00:00	-2.56	0
2022-01-15T11:15:00	-1.82	0
2022-01-15T11:30:00	-1.1	0
2022-01-15T11:45:00	-0.35	0
2022-01-15T12:00:00	0.22	0
2022-01-15T12:15:00	0.8	0
2022-01-15T12:30:00	1.41	0
2022-01-15T12:45:00	1.69	0
2022-01-15T13:00:00	2.5	0
2022-01-15T13:15:00	5.14	0
2022-01-15T13:30:00	5.99	0
2022-01-15T13:45:00	6.31	0
2022-01-15T14:00:00	7.11	0
2022-01-15T14:15:00	5.68	0
2022-01-15T14:30:00	5.8	0
2022-01-15T14:45:00	6.72	0
2022-01-15T15:00:00	5.96	0
2022-01-15T15:15:00	5.16	0
2022-01-15T15:30:00	6.17	0
2022-01-15T15:45:00	4.8	0
2022-01-15T16:00:00	4.08	0
2022-01-15T16:15:00	4.48	0
2022-01-15T16:30:00	4.28	0
2022-01-15T16:45:00	4.17	0
2022-01-15T17:00:00	3.82	0
2022-01-15T17:15:00	3.85	0
2022-01-15T17:30:00	3.99	0
2022-01-15T17:45:00	3.94	0
2022-01-15T18:00:00	4.03	0
2022-01-15T18:15:00	4.32	0
2022-01-15T18:30:00	3.23	0
2022-01-15T18:45:00	2.77	0
2022-01-15T19:00:00	2.44	0
2022-01-15T19:15:00	2.2	0
2022-01-15T19:30:00	1.78	0
2022-01-15T19:45:00	1.6	0
2022-01-15T20:00:00	1.39	0
2022-01-15T20:15:00	1.24	0
2022-01-15T20:30:00	0.98	0
2022-01-15T20:45:00	0.93	0
2022-01-15T21:00:00	0.63	0
2022-01-15T21:15:00	0.57	0
2022-01-15T21:30:00	0.27	0
2022-01-15T21:45:00	0.01	0
2022-01-15T22:00:00	-0.27	0
2022-01-15T22:15:00	-0.38	0
2022-01-15T22:30:00	-0.48	0
2022-01-15T22:45:00	-0.52	0
2022-01-15T23:00:00	-0.82	0
2022-01-15T23:15:00	-0.97	0
2022-01-15T23:30:00	-0.98	0
2022-01-15T23:45:00	-1.1	0
2022-01-16T00:00:00	-1.37	0
2022-01-16T00:15:00	-1.62	0
2022-01-16T00:30:00	-1.83	0
2022-01-16T00:45:00	-2.07	0
2022-01-16T01:00:00	-2.29	0
2022-01-16T01:15:00	-2.37	0
2022-01-16T01:30:00	-2.46	0
2022-01-16T01:45:00	-2.58	0
2022-01-16T02:00:00	-2.87	0
2022-01-16T02:15:00	-3.35	0
2022-01-16T02:30:00	-3.85	0
2022-01-16T02:45:00	-3.91	0
2022-01-16T03:00:00	-3.69	0
2022-01-16T03:15:00	-3.96	0
2022-01-16T03:30:00	-4.08	0
2022-01-16T03:45:00	-4.11	0
2022-01-16T04:00:00	-4.57	0
2022-01-16T04:15:00	-5.15	0
2022-01-16T04:30:00	-5.59	0
2022-01-16T04:45:00	-5.2	0
2022-01-16T05:00:00	-5.17	0
2022-01-16T05:15:00	-5.65	0
2022-01-16T05:30:00	-5.89	0
2022-01-16T05:45:00	-6.09	0
2022-01-16T06:00:00	-5.71	0
2022-01-16T06:15:00	-5.71	0
2022-01-16T06:30:00	-5.88	0
2022-01-16T06:45:00	-6.17	0
2022-01-16T07:00:00	-6.64	0
2022-01-16T07:15:00	-6.6	0
2022-01-16T07:30:00	-6.36	0
2022-01-16T07:45:00	-7.12	0
2022-01-16T08:00:00	-7.99	0
2022-01-16T08:15:00	-8.42	0
2022-01-16T08:30:00	-8.69	0
2022-01-16T08:45:00	-8.79	0
2022-01-16T09:00:00	-8.92	0
2022-01-16T09:15:00	-8.83	0
2022-01-16T09:30:00	-8.81	0
2022-01-16T09:45:00	-8.33	0
2022-01-16T10:00:00	-7.82	0
2022-01-16T10:15:00	-7.24	0
2022-01-16T10:30:00	-6.49	0
2022-01-16T10:45:00	-6.04	0
2022-01-16T11:00:00	-5.62	0
2022-01-16T11:15:00	-5.32	0
2022-01-16T11:30:00	-5.05	0
2022-01-16T11:45:00	-4.45	0
2022-01-16T12:00:00	-3.94	0
2022-01-16T12:15:00	-3.49	0
2022-01-16T12:30:00	-3.05	0
2022-01-16T12:45:00	-2.76	0
2022-01-16T13:00:00	-2.06	0
2022-01-16T13:15:00	0.3	0
2022-01-16T13:30:00	1.18	0
2022-01-16T13:45:00	1.01	0
2022-01-16T14:00:00	1.57	0
2022-01-16T14:15:00	1.34	0
2022-01-16T14:30:00	1.89	0
2022-01-16T14:45:00	2.2	0
2022-01-16T15:00:00	2.41	0
2022-01-16T15:15:00	4.02	0
2022-01-16T15:30:00	3.28	0
2022-01-16T15:45:00	3.06	0
2022-01-16T16:00:00	5.13	0
2022-01-16T16:15:00	5.22	0
2022-01-16T16:30:00	4.1	0
2022-01-16T16:45:00	2.79	0
2022-01-16T17:00:00	3.46	0
2022-01-16T17:15:00	3.37	0
2022-01-16T17:30:00	3.68	0
2022-01-16T17:45:00	3.42	0
2022-01-16T18:00:00	2.17	0
2022-01-16T18:15:00	1.73	0
2022-01-16T18:30:00	-0.13	0
2022-01-16T18:45:00	-1.08	0
2022-01-16T19:00:00	-1.52	0
2022-01-16T19:15:00	-1.44	0
2022-01-16T19:30:00	-1.78	0
2022-01-16T19:45:00	-2.65	0
2022-01-16T20:00:00	-3.2	0
2022-01-16T20:15:00	-3.05	0
2022-01-16T20:30:00	-2.92	0
2022-01-16T20:45:00	-3.69	0
2022-01-16T21:00:00	-3.43	0
2022-01-16T21:15:00	-2.77	0
2022-01-16T21:30:00	-3.24	0
2022-01-16T21:45:00	-3.48	0
2022-01-16T22:00:00	-3.07	0
2022-01-16T22:15:00	-3.28	0
2022-01-16T22:30:00	-3.65	0
2022-01-16T22:45:00	-4.14	0
2022-01-16T23:00:00	-4.1	0
2022-01-16T23:15:00	-4.15	0
2022-01-16T23:30:00	-4.48	0
2022-01-16T23:45:00	-4.72	0
2022-01-17T00:00:00	-5.5	0
2022-01-17T00:15:00	-6.03	0
2022-01-17T00:30:00	-6.58	0
2022-01-17T00:45:00	-6.82	0
2022-01-17T01:00:00	-6.86	0
2022-01-17T01:15:00	-7.04	0
2022-01-17T01:30:00	-7.39	0
2022-01-17T01:45:00	-7.45	0
2022-01-17T02:00:00	-7.72	0
2022-01-17T02:15:00	-7.76	0
2022-01-17T02:30:00	-7.64	0
2022-01-17T02:45:00	-7.73	0
2022-01-17T03:00:00	-7.78	0
2022-01-17T03:15:00	-7.8	0
2022-01-17T03:30:00	-8.12	0
2022-01-17T03:45:00	-8.29	0
2022-01-17T04:00:00	-8.34	0
2022-01-17T04:15:00	-8.55	0
2022-01-17T04:30:00	-8.67	0
2022-01-17T04:45:00	-8.89	0
2022-01-17T05:00:00	-9.15	0
2022-01-17T05:15:00	-9.5	0
2022-01-17T05:30:00	-9.76	0
2022-01-17T05:45:00	-10	0
2022-01-17T06:00:00	-10.24	0
2022-01-17T06:15:00	-10.47	0
2022-01-17T06:30:00	-10.47	0
2022-01-17T06:45:00	-10.65	0
2022-01-17T07:00:00	-10.8	0
2022-01-17T07:15:00	-11.17	0
2022-01-17T07:30:00	-11.34	0
2022-01-17T07:45:00	-11.32	0
2022-01-17T08:00:00	-11.43	0
2022-01-17T08:15:00	-11.55	0
2022-01-17T08:30:00	-11.78	0
2022-01-17T08:45:00	-11.88	0
2022-01-17T09:00:00	-11.99	0
2022-01-17T09:15:00	-12.18	0
2022-01-17T09:30:00	-11.92	0
2022-01-17T09:45:00	-11.64	0
2022-01-17T10:00:00	-11.32	0
2022-01-17T10:15:00	-10.74	0
2022-01-17T10:30:00	-10.37	0
2022-01-17T10:45:00	-9.99	0
2022-01-17T11:00:00	-9.42	0
2022-01-17T11:15:00	-9	0
2022-01-17T11:30:00	-8.46	0
2022-01-17T11:45:00	-8	0
2022-01-17T12:00:00	-7.53	0
2022-01-17T12:15:00	-6.95	0
2022-01-17T12:30:00	-6.55	0
2022-01-17T12:45:00	-5.8	0
2022-01-17T13:00:00	-5.03	0
2022-01-17T13:15:00	-2.8	0
2022-01-17T13:30:00	-1.53	0
2022-01-17T13:45:00	-0.81	0
2022-01-17T14:00:00	0.66	0
2022-01-17T14:15:00	0.8	0
2022-01-17T14:30:00	2.79	0
2022-01-17T14:45:00	2.53	0
2022-01-17T15:00:00	2.71	0
2022-01-17T15:15:00	3.88	0
2022-01-17T15:30:00	4.02	0
2022-01-17T15:45:00	5.69	0
2022-01-17T16:00:00	5.03	0
2022-01-17T16:15:00	5.91	0
2022-01-17T16:30:00	4.49	0
2022-01-17T16:45:00	3.38	0
2022-01-17T17:00:00	4.6	0
2022-01-17T17:15:00	5.51	0
2022-01-17T17:30:00	3.98	0
2022-01-17T17:45:00	2.78	0
2022-01-17T18:00:00	2.41	0
2022-01-17T18:15:00	1.12	0
2022-01-17T18:30:00	0.69	0
2022-01-17T18:45:00	0.4	0
2022-01-17T19:00:00	0.09	0
2022-01-17T19:15:00	-0.78	0
2022-01-17T19:30:00	-1.78	0
2022-01-17T19:45:00	-1.42	0
2022-01-17T20:00:00	-1.66	0
2022-01-17T20:15:00	-1.91	0
2022-01-17T20:30:00	-2.49	0
2022-01-17T20:45:00	-2.85	0
2022-01-17T21:00:00	-2.55	0
2022-01-17T21:15:00	-2.27	0
2022-01-17T21:30:00	-3.61	0
2022-01-17T21:45:00	-4.98	0
2022-01-17T22:00:00	-4.36	0
2022-01-17T22:15:00	-3.82	0
2022-01-17T22:30:00	-4.21	0
2022-01-17T22:45:00	-4.78	0
2022-01-17T23:00:00	-6.02	0
2022-01-17T23:15:00	-6.69	0
2022-01-17T23:30:00	-6.96	0
2022-01-17T23:45:00	-7.15	0
2022-01-18T00:00:00	-8	0
2022-01-18T00:15:00	-8.65	0
2022-01-18T00:30:00	-8.11	0
2022-01-18T00:45:00	-8.38	0
2022-01-18T01:00:00	-8.9	0
2022-01-18T01:15:00	-8.63	0
2022-01-18T01:30:00	-8.6	0
2022-01-18T01:45:00	-7.76	0
2022-01-18T02:00:00	-7.38	0
2022-01-18T02:15:00	-7.37	0
2022-01-18T02:30:00	-8.03	0
2022-01-18T02:45:00	-8.39	0
2022-01-18T03:00:00	-8.32	0
2022-01-18T03:15:00	-8.04	0
2022-01-18T03:30:00	-8.29	0
2022-01-18T03:45:00	-8.34	0
2022-01-18T04:00:00	-8.71	0
2022-01-18T04:15:00	-8.57	0
2022-01-18T04:30:00	-8.69	0
2022-01-18T04:45:00	-8.29	0
2022-01-18T05:00:00	-8.36	0
2022-01-18T05:15:00	-8.71	0
2022-01-18T05:30:00	-8.92	0
2022-01-18T05:45:00	-9.24	0
2022-01-18T06:00:00	-9.4	0
2022-01-18T06:15:00	-9.39	0
2022-01-18T06:30:00	-9.59	0
2022-01-18T06:45:00	-9.24	0
2022-01-18T07:00:00	-9.35	0
2022-01-18T07:15:00	-9.55	0
2022-01-18T07:30:00	-9.39	0
2022-01-18T07:45:00	-9.66	0
2022-01-18T08:00:00	-9.66	0
2022-01-18T08:15:00	-9.66	0
2022-01-18T08:30:00	-9.8	0
2022-01-18T08:45:00	-9.91	0
2022-01-18T09:00:00	-9.85	0
2022-01-18T09:15:00	-9.89	0
2022-01-18T09:30:00	-9.61	0
2022-01-18T09:45:00	-9.26	0
2022-01-18T10:00:00	-9.05	0
2022-01-18T10:15:00	-8.74	0
2022-01-18T10:30:00	-8.18	0
2022-01-18T10:45:00	-7.65	0
2022-01-18T11:00:00	-7.17	0
2022-01-18T11:15:00	-6.6	0
2022-01-18T11:30:00	-6.15	0
2022-01-18T11:45:00	-5.79	0
2022-01-18T12:00:00	-5.29	0
2022-01-18T12:15:00	-4.72	0
2022-01-18T12:30:00	-4.18	0
2022-01-18T12:45:00	-3.52	0
2022-01-18T13:00:00	-2.61	0
2022-01-18T13:15:00	0.06	0
2022-01-18T13:30:00	3.51	0
2022-01-18T13:45:00	3.88	0
2022-01-18T14:00:00	3.99	0
2022-01-18T14:15:00	4.65	0
2022-01-18T14:30:00	7.17	0
2022-01-18T14:45:00	7.01	0
2022-01-18T15:00:00	7.09	0
2022-01-18T15:15:00	7.13	0
2022-01-18T15:30:00	7.26	0
2022-01-18T15:45:00	8.63	0
2022-01-18T16:00:00	9.4	0
2022-01-18T16:15:00	9.47	0
2022-01-18T16:30:00	8.57	0
2022-01-18T16:45:00	6.64	0
2022-01-18T17:00:00	7.25	0
2022-01-18T17:15:00	7.95	0
2022-01-18T17:30:00	8	0
2022-01-18T17:45:00	6.51	0
2022-01-18T18:00:00	4.84	0
2022-01-18T18:15:00	3.76	0
2022-01-18T18:30:00	2.6	0
2022-01-18T18:45:00	1.91	0
2022-01-18T19:00:00	1.24	0
2022-01-18T19:15:00	0.27	0
2022-01-18T19:30:00	-0.73	0
2022-01-18T19:45:00	-0.26	0
2022-01-18T20:00:00	-0.53	0
2022-01-18T20:15:00	-0.38	0
2022-01-18T20:30:00	-0.55	0
2022-01-18T20:45:00	-1.08	0
2022-01-18T21:00:00	-1.91	0
2022-01-18T21:15:00	-2.79	0
2022-01-18T21:30:00	-3.33	0
2022-01-18T21:45:00	-3.29	0
2022-01-18T22:00:00	-3.6	0
2022-01-18T22:15:00	-2.91	0
2022-01-18T22:30:00	-2.5	0
2022-01-18T22:45:00	-2.52	0
2022-01-18T23:00:00	-2.59	0
2022-01-18T23:15:00	-2.84	0
2022-01-18T23:30:00	-2.64	0
2022-01-18T23:45:00	-2.9	0
2022-01-19T00:00:00	-2.74	0
2022-01-19T00:15:00	-3.21	0
2022-01-19T00:30:00	-2.74	0
2022-01-19T00:45:00	-2.57	0
2022-01-19T01:00:00	-2.91	0
2022-01-19T01:15:00	-3.02	0
2022-01-19T01:30:00	-3.17	0
2022-01-19T01:45:00	-3.42	0
2022-01-19T02:00:00	-3.31	0
2022-01-19T02:15:00	-3.44	0
2022-01-19T02:30:00	-3.83	0
2022-01-19T02:45:00	-3.69	0
2022-01-19T03:00:00	-3.15	0
2022-01-19T03:15:00	-3.06	0
2022-01-19T03:30:00	-3.16	0
2022-01-19T03:45:00	-3.44	0
2022-01-19T04:00:00	-3.85	0
2022-01-19T04:15:00	-3.99	0
2022-01-19T04:30:00	-4.26	0
2022-01-19T04:45:00	-4.35	0
2022-01-19T05:00:00	-4.3	0
2022-01-19T05:15:00	-4.39	0
2022-01-19T05:30:00	-4.38	0
2022-01-19T05:45:00	-3.8	0
2022-01-19T06:00:00	-3.75	0
2022-01-19T06:15:00	-3.74	0
2022-01-19T06:30:00	-4.04	0
2022-01-19T06:45:00	-4.19	0
2022-01-19T07:00:00	-3.86	0
2022-01-19T07:15:00	-3.37	0
2022-01-19T07:30:00	-2.48	0
2022-01-19T07:45:00	-2.6	0
2022-01-19T08:00:00	-2.44	0
2022-01-19T08:15:00	-2.8	0
2022-01-19T08:30:00	-3.13	0
2022-01-19T08:45:00	-3.1	0
2022-01-19T09:00:00	-2.79	0
2022-01-19T09:15:00	-2.56	0
2022-01-19T09:30:00	-2.2	0
2022-01-19T09:45:00	-2.21	0
2022-01-19T10:00:00	-2.26	0
2022-01-19T10:15:00	-2.31	0
2022-01-19T10:30:00	-2.02	0
2022-01-19T10:45:00	-2.35	0
2022-01-19T11:00:00	-2.18	0
2022-01-19T11:15:00	-1.16	0
2022-01-19T11:30:00	-0.52	0
2022-01-19T11:45:00	-0.06	0
2022-01-19T12:00:00	0.1	0
2022-01-19T12:15:00	0.18	0
2022-01-19T12:30:00	0.61	0
2022-01-19T12:45:00	0.96	0
2022-01-19T13:00:00	1.55	0
2022-01-19T13:15:00	2.88	0
2022-01-19T13:30:00	4	0
2022-01-19T13:45:00	4.04	0
2022-01-19T14:00:00	4.61	0
2022-01-19T14:15:00	5.79	0
2022-01-19T14:30:00	6.73	0
2022-01-19T14:45:00	6.08	0
2022-01-19T15:00:00	5.1	0
2022-01-19T15:15:00	6.62	0
2022-01-19T15:30:00	6.4	0
2022-01-19T15:45:00	4.71	0
2022-01-19T16:00:00	5.36	0
2022-01-19T16:15:00	4.08	0
2022-01-19T16:30:00	2.91	0
2022-01-19T16:45:00	2.71	0
2022-01-19T17:00:00	-1.39	0
2022-01-19T17:15:00	-0.71	0
2022-01-19T17:30:00	0.2	0
2022-01-19T17:45:00	1.83	0
2022-01-19T18:00:00	3.7	0
2022-01-19T18:15:00	3.84	0
2022-01-19T18:30:00	1.15	0
2022-01-19T18:45:00	0.01	0
2022-01-19T19:00:00	-0.67	0
2022-01-19T19:15:00	-1.09	0
2022-01-19T19:30:00	-0.93	0
2022-01-19T19:45:00	-1.48	0
2022-01-19T20:00:00	-2.66	0
2022-01-19T20:15:00	-2.9	0
2022-01-19T20:30:00	-2.54	0
2022-01-19T20:45:00	-2	0
2022-01-19T21:00:00	-2.3	0
2022-01-19T21:15:00	-2.98	0
2022-01-19T21:30:00	-3.59	0
2022-01-19T21:45:00	-4.02	0
2022-01-19T22:00:00	-3.06	0
2022-01-19T22:15:00	-2.97	0
2022-01-19T22:30:00	-2.75	0
2022-01-19T22:45:00	-2.85	0
2022-01-19T23:00:00	-2.97	0
2022-01-19T23:15:00	-3.17	0
2022-01-19T23:30:00	-3.16	0
2022-01-19T23:45:00	-3.35	0
2022-01-20T00:00:00	-3.27	0
2022-01-20T00:15:00	-3.86	0
2022-01-20T00:30:00	-4.37	0
2022-01-20T00:45:00	-4.49	0
2022-01-20T01:00:00	-4.61	0
2022-01-20T01:15:00	-4.71	0
2022-01-20T01:30:00	-4.72	0
2022-01-20T01:45:00	-4.63	0
2022-01-20T02:00:00	-4.52	0
2022-01-20T02:15:00	-4.74	0
2022-01-20T02:30:00	-5.11	0
2022-01-20T02:45:00	-5.47	0
2022-01-20T03:00:00	-5.77	0
2022-01-20T03:15:00	-5.79	0
2022-01-20T03:30:00	-5.91	0
2022-01-20T03:45:00	-5.88	0
2022-01-20T04:00:00	-6.03	0
2022-01-20T04:15:00	-6.23	0
2022-01-20T04:30:00	-6.3	0
2022-01-20T04:45:00	-6.36	0
2022-01-20T05:00:00	-6.39	0
2022-01-20T05:15:00	-6.38	0
2022-01-20T05:30:00	-6.45	0
2022-01-20T05:45:00	-6.56	0
2022-01-20T06:00:00	-6.71	0
2022-01-20T06:15:00	-6.82	0
2022-01-20T06:30:00	-6.8	0
2022-01-20T06:45:00	-6.75	0
2022-01-20T07:00:00	-6.7	0
2022-01-20T07:15:00	-6.74	0
2022-01-20T07:30:00	-6.9	0
2022-01-20T07:45:00	-7	0
2022-01-20T08:00:00	-7.05	0
2022-01-20T08:15:00	-7.17	0
2022-01-20T08:30:00	-7.29	0
2022-01-20T08:45:00	-7.32	0
2022-01-20T09:00:00	-7.41	0
2022-01-20T09:15:00	-7.46	0
2022-01-20T09:30:00	-7.38	0
2022-01-20T09:45:00	-7.24	0
2022-01-20T10:00:00	-6.82	0
2022-01-20T10:15:00	-6.45	0
2022-01-20T10:30:00	-6.12	0
2022-01-20T10:45:00	-5.94	0
2022-01-20T11:00:00	-5.62	0
2022-01-20T11:15:00	-5.05	0
2022-01-20T11:30:00	-4.64	0
2022-01-20T11:45:00	-4.22	0
2022-01-20T12:00:00	-3.88	0
2022-01-20T12:15:00	-3.48	0
2022-01-20T12:30:00	-2.67	0
2022-01-20T12:45:00	-2.03	0
2022-01-20T13:00:00	-0.77	0
2022-01-20T13:15:00	1.41	0
2022-01-20T13:30:00	3.26	0
2022-01-20T13:45:00	3.9	0
2022-01-20T14:00:00	3.55	0
2022-01-20T14:15:00	5.19	0
2022-01-20T14:30:00	4.93	0
2022-01-20T14:45:00	5.4	0
2022-01-20T15:00:00	6.08	0
2022-01-20T15:15:00	6.1	0
2022-01-20T15:30:00	6.52	0
2022-01-20T15:45:00	6.24	0
2022-01-20T16:00:00	6.56	0
2022-01-20T16:15:00	6	0
2022-01-20T16:30:00	6.02	0
2022-01-20T16:45:00	4.26	0
2022-01-20T17:00:00	5.73	0
2022-01-20T17:15:00	5.45	0
2022-01-20T17:30:00	4.43	0
2022-01-20T17:45:00	4.25	0
2022-01-20T18:00:00	4.48	0
2022-01-20T18:15:00	4.16	0
2022-01-20T18:30:00	2.92	0
2022-01-20T18:45:00	2.04	0
2022-01-20T19:00:00	1.64	0
2022-01-20T19:15:00	1.31	0
2022-01-20T19:30:00	0.45	0
2022-01-20T19:45:00	-0.1	0
2022-01-20T20:00:00	-1.02	0
2022-01-20T20:15:00	-2.11	0
2022-01-20T20:30:00	-2.41	0
2022-01-20T20:45:00	-2.34	0
2022-01-20T21:00:00	-2.08	0
2022-01-20T21:15:00	-2.19	0
2022-01-20T21:30:00	-2.09	0
2022-01-20T21:45:00	-1.95	0
2022-01-20T22:00:00	-1.53	0
2022-01-20T22:15:00	-1.41	0
2022-01-20T22:30:00	-1.66	0
2022-01-20T22:45:00	-0.86	0
2022-01-20T23:00:00	-1.34	0
2022-01-20T23:15:00	-1.82	0
2022-01-20T23:30:00	-2.14	0
2022-01-20T23:45:00	-2.11	0
2022-01-21T00:00:00	-1.51	0
2022-01-21T00:15:00	-1.42	0
2022-01-21T00:30:00	-1.64	0
2022-01-21T00:45:00	-1.58	0
2022-01-21T01:00:00	-1.27	0
2022-01-21T01:15:00	-1.45	0
2022-01-21T01:30:00	-1.57	0
2022-01-21T01:45:00	-1.75	0
2022-01-21T02:00:00	-1.94	0
2022-01-21T02:15:00	-2.18	0
2022-01-21T02:30:00	-2.39	0
2022-01-21T02:45:00	-2.52	0
2022-01-21T03:00:00	-2.56	0
2022-01-21T03:15:00	-2.84	0
2022-01-21T03:30:00	-3.09	0
2022-01-21T03:45:00	-3.25	0
2022-01-21T04:00:00	-3.29	0
2022-01-21T04:15:00	-3.5	0
2022-01-21T04:30:00	-3.85	0
2022-01-21T04:45:00	-4.16	0
2022-01-21T05:00:00	-4.35	0
2022-01-21T05:15:00	-4.66	0
2022-01-21T05:30:00	-4.66	0
2022-01-21T05:45:00	-4	0
2022-01-21T06:00:00	-3.87	0
2022-01-21T06:15:00	-3.99	0
2022-01-21T06:30:00	-4.24	0
2022-01-21T06:45:00	-4.22	0
2022-01-21T07:00:00	-4.08	0
2022-01-21T07:15:00	-4.22	0
2022-01-21T07:30:00	-4.14	0
2022-01-21T07:45:00	-4.18	0
2022-01-21T08:00:00	-4.15	0
2022-01-21T08:15:00	-4.18	0
2022-01-21T08:30:00	-4.05	0
2022-01-21T08:45:00	-4.18	0
2022-01-21T09:00:00	-4.19	0
2022-01-21T09:15:00	-4.07	0
2022-01-21T09:30:00	-3.85	0
2022-01-21T09:45:00	-3.59	0
2022-01-21T10:00:00	-3.18	0
2022-01-21T10:15:00	-2.82	0
2022-01-21T10:30:00	-2.32	0
2022-01-21T10:45:00	-2.17	0
2022-01-21T11:00:00	-1.81	0
2022-01-21T11:15:00	-1.46	0
2022-01-21T11:30:00	-0.56	0
2022-01-21T11:45:00	-0.44	0
2022-01-21T12:00:00	0.21	0
2022-01-21T12:15:00	0.28	0
2022-01-21T12:30:00	-0.58	0
2022-01-21T12:45:00	-0.66	0
2022-01-21T13:00:00	0.86	0
2022-01-21T13:15:00	3.52	0
2022-01-21T13:30:00	5.69	0
2022-01-21T13:45:00	4.37	0
2022-01-21T14:00:00	4.93	0
2022-01-21T14:15:00	3.77	0
2022-01-21T14:30:00	3.13	0
2022-01-21T14:45:00	3.62	0
2022-01-21T15:00:00	5.71	0
2022-01-21T15:15:00	6.63	0
2022-01-21T15:30:00	7.04	0
2022-01-21T15:45:00	7.26	0
2022-01-21T16:00:00	5.96	0
2022-01-21T16:15:00	7.53	0
2022-01-21T16:30:00	5.67	0
2022-01-21T16:45:00	5.1	0
2022-01-21T17:00:00	7.27	0
2022-01-21T17:15:00	6.49	0
2022-01-21T17:30:00	6.73	0
2022-01-21T17:45:00	7.62	0
2022-01-21T18:00:00	6.94	0
2022-01-21T18:15:00	7.22	0
2022-01-21T18:30:00	4.4	0
2022-01-21T18:45:00	2.4	0
2022-01-21T19:00:00	1.85	0
2022-01-21T19:15:00	1.07	0
[truncated: 89,970 more rows]
